# Supplementary material
Source: publisher figshare collection journal article supplement (https://acs.figshare.com/ndownloader/files/5075635)
Supplement: Supplementary file 1 [file 5075635]

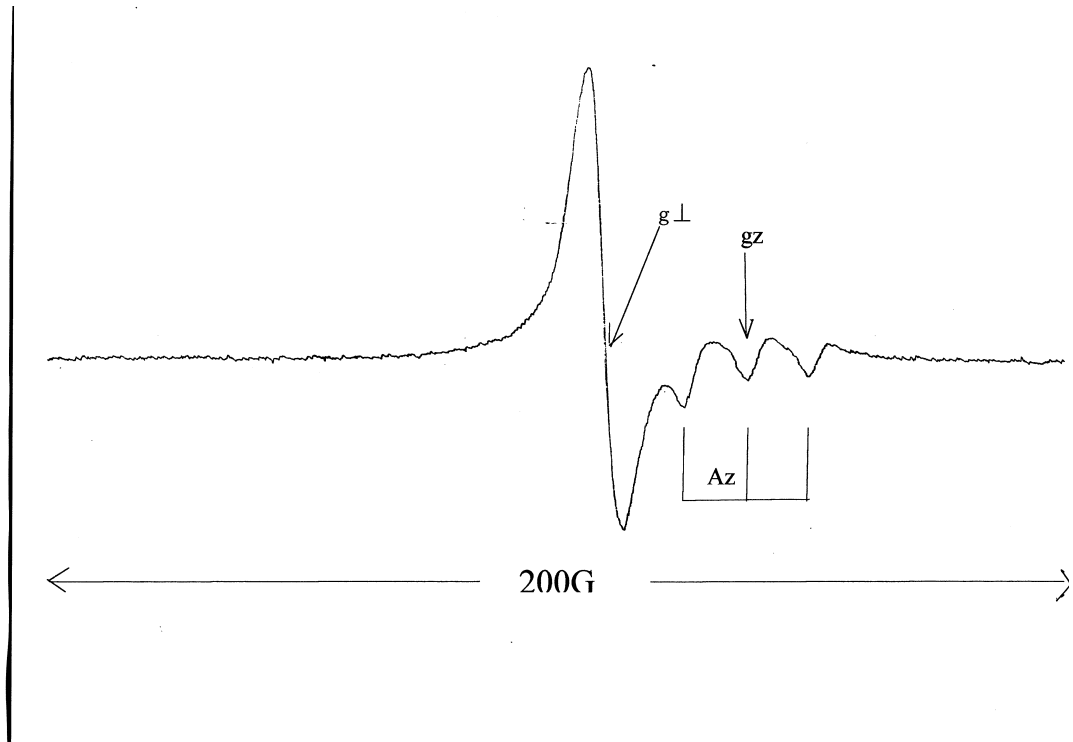

Supporting Figure 2. Q-band powder-pattern ESR spectrum of the phenoxyl radical derivative generated from a novel probe,  $\alpha$ -(3, 5-di-*tert*-butyl-4-hydroxyphenyl)-*N-tert*-butylnitron
